# Supplementary material for: Long-term instability of the intestinal microbiome is associated with metabolic liver disease, low microbiota diversity, diabetes mellitus and impaired exocrine pancreatic function
Source: PubMed Central journal article supplement — Gut. 2020 Nov 9;70(3):522–30. doi: 10.1136/gutjnl-2020-322753 (PMC7873430; doi:10.1136/gutjnl-2020-322753), 2020-11-09
Supplement: gutjnl-2020-322753supp004.pdf [file gutjnl-2020-322753supp004.pdf]

## Decreased Predicted Metagenomic Pathways

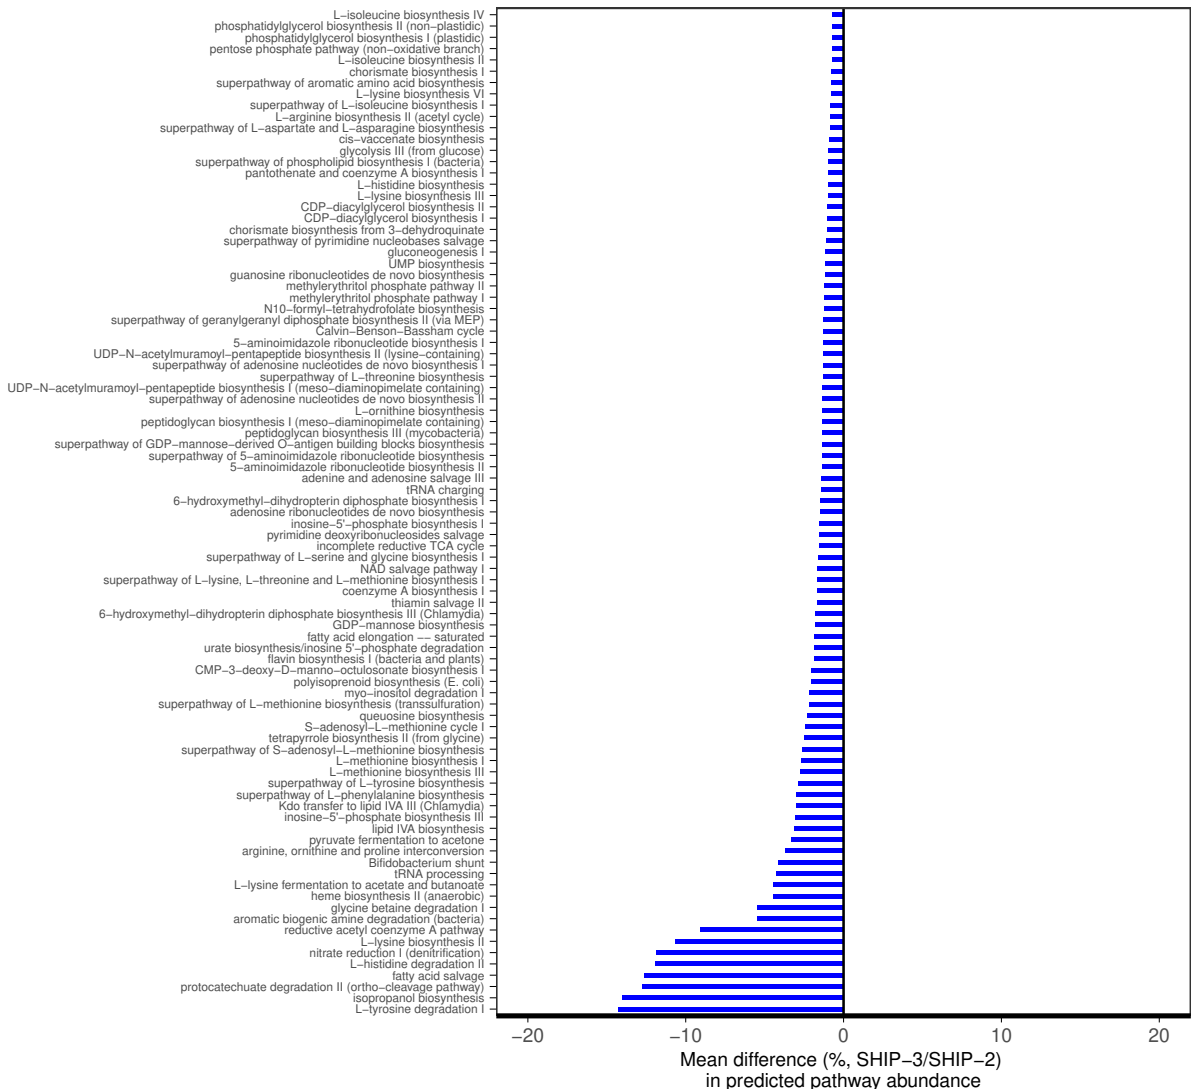

Figure S2. Predicted microbiota pathway abundance changes from SHIP-2 to SHIP-3. Shown are the percentage changes in abundance of all pathways with a significant ( $q < 0.05$ ) decrease in abundance over time.
