# Supplementary material for: Long-term instability of the intestinal microbiome is associated with metabolic liver disease, low microbiota diversity, diabetes mellitus and impaired exocrine pancreatic function
Source: PubMed Central journal article supplement — Gut. 2020 Nov 9;70(3):522–30. doi: 10.1136/gutjnl-2020-322753 (PMC7873430; doi:10.1136/gutjnl-2020-322753), 2020-11-09
Supplement: gutjnl-2020-322753supp006.pdf [file gutjnl-2020-322753supp006.pdf]

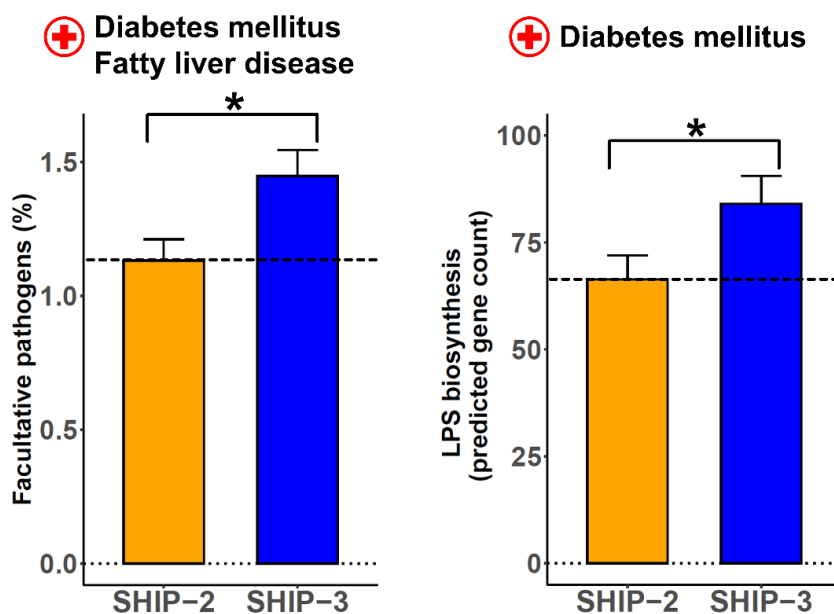

**Figure S4.** Comparison of facultative pathogenic bacteria (*Enterobacteriaceae*, *Escherichia.Shigella*, and *Citrobacter*) and predicted lipopolysaccharide (LPS) biosynthesis capability. Barplots (mean  $\pm$  standard error of the mean) indicate the increase in facultative pathogens and predicted LPS biosynthesis capability from SHIP-2 to SHIP-3 which were both associated with diabetes mellitus. Fatty liver disease was associated with the increase in facultative pathogens. \* indicates significant difference.
